# Supplementary material for: Inhibiting Left dlPFC Leaves Relational Evaluative Conditioning Unchanged: Evidence From Electrical Brain Stimulation
Source: Research Square preprint supplement (doi:10.21203/rs.3.rs-7252129/v1), 2025-08-21
Supplement: Supplementary file 1 [file 9b7c0e16d22b3ea92758a615.docx]

# SUPPLEMENTARY MATERIALS

for an article titled:

# Inhibiting Left dlPFC Leaves Relational Evaluative Conditioning Unchanged: Evidence From Electrical Brain Stimulation.

*Psychological Research*

##

Authors:

Joanna Wąsowicz (corresponding author)

*Institute of Psychology, Polish Academy of Sciences, Warsaw, Poland;*

*The Graduate School for Social Research, Warsaw, Poland*

E-mail: jwasowicz@sd.psych.pan.pl

ORCID ID: 0009-0009-7036-150X

Robert Balas

*Institute of Psychology, Polish Academy of Sciences, Warsaw, Poland*

ORCID ID: 0000-0002-1906-216X

Katarzyna Gajos

*Institute of Psychology, Polish Academy of Sciences, Warsaw, Poland*

ORCID ID: 0009-0003-1378-2398

##

## The study inclusion criteria

To take part in the experiment, participants had to meet all inclusion criteria, which were designed to ensure their comfort and safety. The criteria were as follows:

1. age between 18 and 35 years,
2. native proficiency in Polish language,
3. no skin lesions or sensitivity on the scalp,
4. no history of seizures,
5. no neurological disorders,
6. no implants in the body that may respond to or heat up in response to electrical current (e.g., pacemakers, intracranial valves, metal implants in the skull),
7. no metal elements in the head (e.g., surgical clips or fragments, metal orthodontic appliances),
8. no frequent or severe headaches,
9. no serious medical conditions,
10. no diagnosed neurological or psychiatric disorders,
11. no use of neuropsychotropic medication or substances affecting neuroplasticity,
12. no history of significant alcohol or psychoactive substance abuse,
13. not currently pregnant or at risk of being pregnant

## Instruction to the Conditioning Procedure

Before the Conditioning part of the experiment, participants received an introduction to follow. Full instruction (translated from Polish) is described below.

*In the next task, you will repeatedly hear sounds and see images.
The sounds have either a positive or negative meaning. In some cases, an image will start the sound, and in others, it will stop it.*

*An image can serve one of four roles:*

- *start a positive sound,*
- *stop a positive sound,*
- *start a negative sound,*
- *stop a negative sound.*

*Listen carefully and pay close attention to what appears on the screen.* ***Try to remember the role of each image****, as this will be tested later in the study.*

*Click "Next" to begin the task.*

## Instruction to the Memory Task

Right before the Memory Task, participants received an introduction, which – translated from Polish – is presented below.

*The next task is a memory test. You will once again see each image and will have to determine whether it:*

- *started a positive sound,*
- *ended a positive sound,*
- *started a negative sound,*
- *ended a negative sound.*

*Images that* ***started a positive sound*** *or* ***ended a negative sound*** *have a* ***positive meaning****. They signal the beginning of something positive or the end of something negative.* ***Press "P"*** *if the image had a positive meaning.*

*Images that* ***started a negative sound*** *or* ***ended a positive sound*** *have a* ***negative meaning****. They signal the beginning of something negative or the end of something positive.* ***Press "N"*** *if the image had a negative meaning.*

***Summary:***

- ***Started a positive sound*** *→* ***press "P"*** *(positive meaning)*
- ***Ended a positive sound*** *→* ***press "N"*** *(negative meaning)*
- ***Started a negative sound*** *→* ***press "N"*** *(negative meaning)*
- ***Ended a negative sound*** *→* ***press "P"*** *(positive meaning)*

*If you don't remember the meaning of the image, try to guess.*

## CS Prerating LMM analysis results

To examine whether mean image ratings in the prerating phase differed as a function of tDCS stimulation group (active vs. sham), CS type (StartingPositive, EndingNegative, EndingPositive, StartingNegative), and their interaction, a linear mixed-effects model (LMM) was conducted. Group, CS type, and their interaction were included as fixed effects, with participant modeled as a random intercept. The model was estimated using restricted maximum likelihood (REML), and *t*-tests with Satterthwaite’s approximation for degrees of freedom were used to assess significance.

The model revealed no significant main effect of group, b = –1.32, SE = 0.71, t(107.39) = –1.86, p = .07. There were also no significant main effects of CS type compared to the reference category (StartingPositive): EndingNegative: b = –0.42, SE = 0.69, t(110.27) = –0.62, p = .54; EndingPositive: b = –0.02, SE = 0.64, t(195.02) = –0.03, p = .98; StartingNegative: b = –1.02, SE = 0.62, t(285.64) = –1.66, p = .10. Similarly, none of the interaction effects between group and CS type reached statistical significance: Group × EndingNegative: b = 0.51, SE = 0.96, t(110.16) = 0.53, p = .60; Group × EndingPositive: b = 0.80, SE = 0.90, t(194.80) = 0.89, p = .37; Group × StartingNegative: b = 1.61, SE = 0.86, t(285.30) = 1.86, p = .06.

## MPT model tree structure

The general structure of the MPT model tree was adapted from Kukken et al. (2020). Each branch represents the probability of providing a response consistent with the implied valence of the CS: a positive response for CS that started a positive sound (SP) or ended a negative one (EN), and a negative response for CS that started a negative sound (SN) or ended a positive one (EP). Below is the provided tree structure in the TreeBUGS modeling:

*SP SP.positive m*

*SP SP.positive (1-m)*p*

*SP SP.positive (1-m)*(1-p)*g*

*SP SP.negative (1-m)*(1-p)*(1-g)*

*EP EP.negative m*

*EP EP.positive (1-m)*p*

*EP EP.positive (1-m)*(1-p)*g*

*EP EP.negative (1-m)*(1-p)*(1-g)*

*SN SN.negative m*

*SN SN.negative (1-m)*p*

*SN SN.positive (1-m)*(1-p)*g*

*SN SN.negative (1-m)*(1-p)*(1-g)*

*EN EN.positive m*

*EN EN.negative (1-m)*p*

*EN EN.positive (1-m)*(1-p)*g*

*EN EN.negative (1-m)*(1-p)*(1-g)*

## MPT model for Dichotomous Evaluation Task

The modeling of Evaluation Task data was performed similarly to the Memory Task. It was estimated using four Markov chains with 50,000 iterations each and adaptation phase set to 50,000 iterations, with a thinning rate of 1. The model was well-fitted, the posterior predictive p-value (PPP) for the mean response structure (T1) was .657 (observed = 0.03; predicted = 0.05), while the PPP for the covariance structure (T2) was 0.595 (observed = 2.41; predicted = 2.84).

Pearson’s chi-square test showed a variability in response frequencies across participants, χ²(525) = 590.39, p = 0.025, suggesting different parameter estimates on an individual level.

The model results are described in Table 3. The mean parameter estimates for Evaluation Task are comparable to those from Memory Task. Similarly to the other model, there were no group-level effects of tDCS stimulation (active vs. sham) — all 95% credible intervals overlapped with zero.
